# Supplementary material for: Mitochondrial Cochaperone Mge1 Is Involved in Regulating Susceptibility to Fluconazole in Saccharomyces cerevisiae and Candida Species
Source: PubMed Central journal article supplement (PMC5516249; doi:10.1128/mbio.00201-17), 2017-07-18

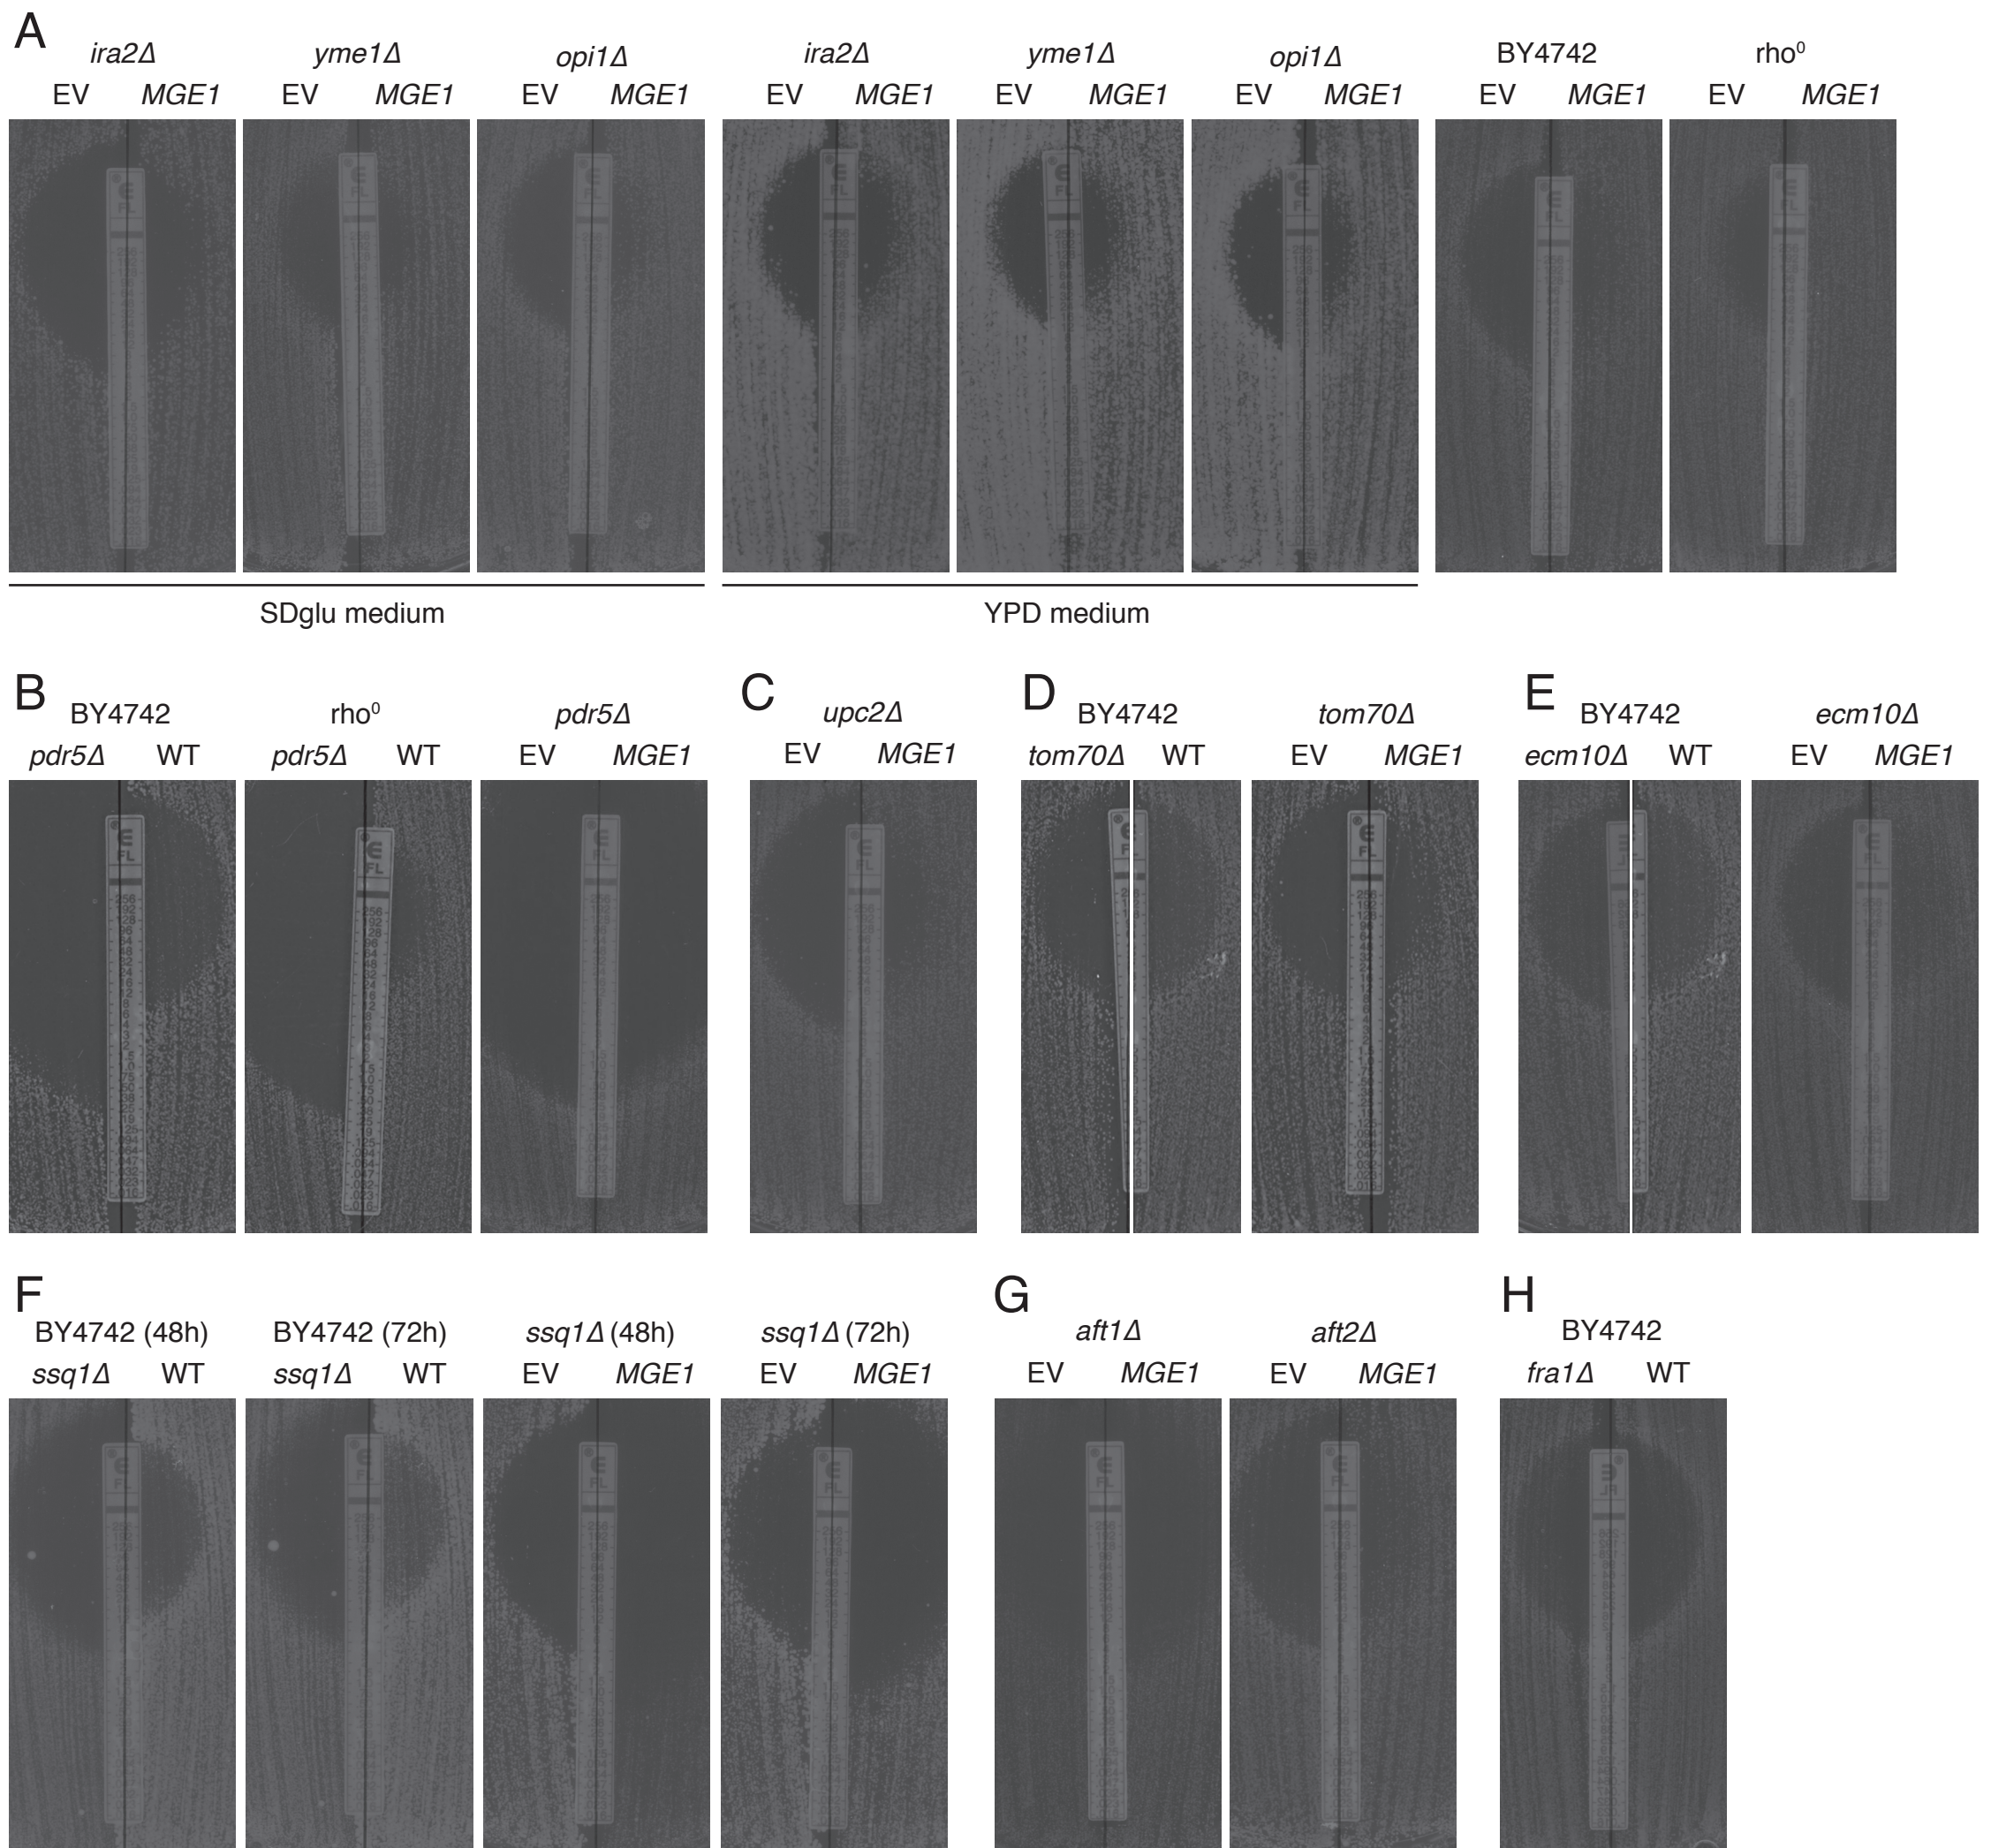

Supplement: mbo004173389sf1.pdf [file mbo004173389sf1.pdf]
