# Supplementary material for: Mitochondrial Cochaperone Mge1 Is Involved in Regulating Susceptibility to Fluconazole in Saccharomyces cerevisiae and Candida Species
Source: PubMed Central journal article supplement (PMC5516249; doi:10.1128/mbio.00201-17), 2017-07-18
Supplement: mbo004173389st1.pdf [file mbo004173389st1.pdf]

| Strain name                                     | Genotype                                                                                                                                                          | Reference         |
|-------------------------------------------------|-------------------------------------------------------------------------------------------------------------------------------------------------------------------|-------------------|
| <b><i>Saccharomyces cerevisiae</i> strains</b>  |                                                                                                                                                                   |                   |
| BY4742                                          | <i>MAT<math>\alpha</math></i> ; <i>his3<math>\Delta</math></i> ; <i>leu2<math>\Delta</math></i> ; <i>lys2<math>\Delta</math></i> ; <i>ura3<math>\Delta</math></i> | Euroscarf         |
| AFc202                                          | Same as BY4742 with <i>ERG11-3xHA</i>                                                                                                                             | This study        |
| <i>ira2<math>\Delta</math></i>                  | Same as BY4742 with <i>ira2<math>\Delta</math>::kanMX4</i>                                                                                                        | Y.K.O. collection |
| <i>opi1<math>\Delta</math></i>                  | Same as BY4742 with <i>opi1<math>\Delta</math>::kanMX4</i>                                                                                                        | Y.K.O. collection |
| <i>yme1<math>\Delta</math></i>                  | Same as BY4742 with <i>yme1<math>\Delta</math>::kanMX4</i>                                                                                                        | Y.K.O. collection |
| <i>pdr5<math>\Delta</math></i>                  | Same as BY4742 with <i>pdr5<math>\Delta</math>::hphNT1</i>                                                                                                        | This study        |
| <i>ssq1<math>\Delta</math></i>                  | Same as BY4742 with <i>ssq1<math>\Delta</math>::kanMX4</i>                                                                                                        | Y.K.O. collection |
| <i>tom70<math>\Delta</math></i>                 | Same as BY4742 with <i>tom70<math>\Delta</math>::kanMX4</i>                                                                                                       | Y.K.O. collection |
| <i>ecm10<math>\Delta</math></i>                 | Same as BY4742 with <i>ecm10<math>\Delta</math>::kanMX4</i>                                                                                                       | Y.K.O. collection |
| <i>aft1<math>\Delta</math></i>                  | Same as BY4742 with <i>aft1<math>\Delta</math>::kanMX4</i>                                                                                                        | Y.K.O. collection |
| <i>aft2<math>\Delta</math></i>                  | Same as BY4742 with <i>aft2<math>\Delta</math>::kanMX4</i>                                                                                                        | Y.K.O. collection |
| <i>fra1<math>\Delta</math></i>                  | Same as BY4742 with <i>fra1<math>\Delta</math>::kanMX4</i>                                                                                                        | Y.K.O. collection |
| rho <sup>0</sup>                                | Same as BY4742, loss of mitochondrial DNA                                                                                                                         | This study        |
| rho <sup>0</sup> <i>pdr5<math>\Delta</math></i> | Same as rho <sup>0</sup> with <i>pdr5<math>\Delta</math>::hphNT1</i>                                                                                              | This study        |
| <b><i>Candida glabrata</i> strains</b>          |                                                                                                                                                                   |                   |
| 2001HTL                                         | ATCC 2001 with <i>his3<math>\Delta</math></i> ; <i>leu2<math>\Delta</math></i> ; <i>trp1<math>\Delta</math></i>                                                   | (1)               |
| <b><i>Candida albicans</i> strains</b>          |                                                                                                                                                                   |                   |
| SC5314                                          | Clinical isolate, wild type                                                                                                                                       | (2)               |
| LDa01 to 08                                     | Same as SC5314 with pLD01 integrated,<br>Eight independent transformants with<br>varying expression levels of <i>CaMGE1</i>                                       | This study        |
| LDa09                                           | Same as SC5314 with CIp10- <i>NAT1</i> integrated                                                                                                                 | This study        |

Table S1. Strains used in this study.

1. **Schwarzmueller T, Ma B, Hiller E, Istel F, Tscherner M, Brunke S, Ames L, Firon A, Green B, Cabral V, Marcet-Houben M, Jacobsen ID, Quintin J, Seider K, Frohner I, Glaser W, Jungwirth H, Bachellier-Bassi S, Chauvel M, Zeidler U, Ferrandon D, Gabaldon T, Hube B, d'Enfert C, Rupp S, Cormack B, Haynes K, Kuchler K.** 2014. Systematic phenotyping of a large-scale *Candida glabrata* deletion collection reveals novel antifungal tolerance genes. *PLoS Pathog* **10**:e1004211.
2. **Fonzi WA, Irwin MY.** 1993. Isogenic strain construction and gene mapping in *Candida albicans*. *Genetics* **134**:717-728.
