# Supplementary material for: Mitochondrial Cochaperone Mge1 Is Involved in Regulating Susceptibility to Fluconazole in Saccharomyces cerevisiae and Candida Species
Source: PubMed Central journal article supplement (PMC5516249; doi:10.1128/mbio.00201-17), 2017-07-18
Supplement: mbo004173389st2.pdf [file mbo004173389st2.pdf]

| Primer name                                                                                                                | Sequence (5'→3')                                                                                  |
|----------------------------------------------------------------------------------------------------------------------------|---------------------------------------------------------------------------------------------------|
| <b>Primers used for tagging <i>ScERG11</i> with 3xHA tag in the genome</b>                                                 |                                                                                                   |
| ScERG11_3xHAtag_Fw                                                                                                         | CAAGATCATCTGGGAAAAGAGAAATCCAGAACAA<br>AAGATCAGGGAACAAAAGCTGG                                      |
| ScERG11_3xHAtag_Rev                                                                                                        | TCTCTTTTTCTGTTTTTTTTTTTTTCTCAGTTACAA<br>ACCCTATAGGGCGAATTGG                                       |
| <b>Primers used for deleting <i>PDR5</i> in the genome of <i>S. cerevisiae</i> using <i>hphNT1</i></b>                     |                                                                                                   |
| hphNT1_PDR5_Fw                                                                                                             | ACTTTCGAAAAAGAAATTAAGACCCTTTTAAGTT<br>TTCGTATCCGCTCGTTTCGAAAGACTTTAGACAAAA<br>CGTACGCTGCAGGTCGAC  |
| hphNT1_PDR5_Rev                                                                                                            | GTGATTATGTATGTTTATTAATAAAAGTCCATCTTG<br>GTAAGTTTCTTTTCTTAACCAAATTCAAATTCTA<br>ATCGATGAATTCGAGCTCG |
| <b>Primers used for cloning <i>MGE1-GFP</i> in YEPlac195</b>                                                               |                                                                                                   |
| MGE1-GFP-Fw1                                                                                                               | TCACGACGTTGTAAAACGACGGCCAGTGAATTCG<br>AGCTCGGTACCTTCAGTGATATTTAATACCTCGC                          |
| MGE1-GFP-Rev1                                                                                                              | GTGAAAAGTTCTTCTCCTTTTGAACCACCTCCACC<br>AGAACCTCCACCTCCGTTCTCTTCGCCCTTAAC                          |
| MGE1-GFP-Fw2                                                                                                               | TTGTTAAGGGCGAAGAGAACGGAGGTGGAGGTTC<br>TGGTGGAGGTGGTTCAAAGGAGAAGAACTTTTC<br>ACTG                   |
| MGE1-GFP-Rev2                                                                                                              | TATAGATAAAGTCGTAGGTAGTAATAATTCTTCAT<br>CAAGGCTATTTGTATAGTTCATCCATGCC                              |
| MGE1-GFP-Fw3                                                                                                               | AGCTGCTGGGATTACACATGGCATGGATGAACTA<br>TACAAATAGCCTTGATGAAGAATTACTACC                              |
| MGE1-GFP-Rev3                                                                                                              | TCACACAGGAAACAGCTATGACCATGATTACGCC<br>AAGCTTGCATGCCTCGAGAAAATAAAAAGGTG                            |
| <b>Primers used for cloning the <i>CaACT1</i> promoter, <i>NAT1</i> and <i>CaACT1</i> terminator in Clp10</b>              |                                                                                                   |
| NAT1_Cloning_Fw                                                                                                            | AGATCAGCGGCCGCGTTTATAATAAACTTAGTC                                                                 |
| NAT1_Cloning_Rev                                                                                                           | TCGCCTACTAGTATTTTATGATGGAATGAATGGGA<br>T                                                          |
| <b>Primers used for cloning the <i>CaACT1</i> promoter, <i>CaMGE1</i> and <i>CaACT1</i> terminator in the MCS of Clp10</b> |                                                                                                   |

|                    |                                                          |
|--------------------|----------------------------------------------------------|
| pACT1_Cloning_Fw   | TCGGTACGCGTCAGCCTCGTTTATAATAAACTTAG<br>TCTAATATTTCTTTTGG |
| pACT1_Cloning_Rev  | GCTCACTGCAGCATTTTGAATGATTATATTTTTTTA<br>ATATTAATATCGAG   |
| CaMGE1_Cloning_Fw  | AAACTGCAGATGCATAGAGCTTTATATAAT                           |
| CaMGE1_Cloning_Rev | CCATCGATTCAATTGTCATCTTCAGATTTG                           |
| tACT1_Cloning_Fw   | GATACCTCGAGGAGTGAAATTCTGGAAATCTGGA<br>AATCTGGTTTTGTATTC  |
| tACT1_Cloning_Rev  | CCAATGGTACCGACATTTTATGATGGAATGAATGG<br>GATGAATCATCAAAC   |

**Primers used for cloning *CgPGK1* or *CgTDH3* promoters and *CgMGE1* (with terminator) in pCgACH plasmid**

|                    |                                                                                    |
|--------------------|------------------------------------------------------------------------------------|
| pPGK1_Cloning_Fw   | CGACGGCCAGTGAATTCGAGCTCCCGCGGAGACG<br>GTTAGCCATCATATACGCATATACGA                   |
| pPGK1_Cloning_Rev  | CTCTCATGTCGACTATCGAATAGATGTATGTATGC<br>CGTCTTGCCAATTGACAATAATCA                    |
| pTDH3_Cloning_Fw   | CGACGGCCAGTGAATTCGAGCTCCCGCGGCGTCA<br>TGCAGGGATTGTCCGTCTCC                         |
| pTDH3_Cloning_Rev  | CTCTCATGTCGACTTTTGATGTTATGTTTGTGTGA<br>TTTGTAGGTGTTTTAATT                          |
| CgMGE1_Cloning     | ATCTATTCGATAGTCGACATGAGAGCTTTCAGTAA                                                |
| pPGK1_Fw           | CGTTTCCAGAAT                                                                       |
| CgMGE1_Cloning     | ATAACATCAAAGTCGACATGAGAGCTTTCAGTA                                                  |
| pTDH3_Fw           | ACGTTTCCAGAAT                                                                      |
| CgMGE1_Cloning_Rev | TTACGCCAAGCTTGCATGCGCGGCCGCTTATATAT<br>ATCATTAGTATTATATATTTGAAACTGGTCTTTTTG<br>ACA |

**Primers used for qRT-PCR**

|                  |                         |
|------------------|-------------------------|
| ScMGE1_qPCR_Fw   | ACAGGGGTTAGAATGACAAGAGA |
| ScMGE1_qPCR_Rev  | CGTTGCTTCGTGTTTATTTGG   |
| ScERG11_qPCR_Fw  | CACGAATTTGTCTTCAACGCTAA |
| ScERG11_qPCR_Rev | AGTCAAATGAGCGTAAGCAGCTT |
| ScARN1_qPCR_Fw   | TTGAAGGGCCAGAAGTCCTA    |

|                  |                           |
|------------------|---------------------------|
| ScARN1_qPCR_Rev  | AACCCATCAAAAGGACACCA      |
| ScFET3_qPCR_Fw   | CGGTGTGAATTACGCCTTCT      |
| ScFET3_qPCR_Rev  | TTTCGGAGTTGTTTGCTTGA      |
| ScFIT1_qPCR_Fw   | TTCTAGGGATGCCCAATCTG      |
| ScFIT1_qPCR_Rev  | GGATACCATTTTTGTGCTTGC     |
| ScFRE1_qPCR_Fw   | CACCAAAAAGTGCATGGTTCT     |
| ScFRE1_qPCR_Rev  | TCTGGATTGTTTGGATCACG      |
| ScFTR1_qPCR_Fw   | AAGAAAGGCGTGGTCACTTG      |
| ScFTR1_qPCR_Rev  | TTCCGTCAACTCCTGCTTTT      |
| ScHMX1_qPCR_Fw   | AACACGCTTGAAATGGGAAT      |
| ScHMX1_qPCR_Rev  | TCTGCGACGCTAATGATCTG      |
| ScERG19_qPCR_Fw  | GCGTATCATCAGTTGGTGCC      |
| ScERG19_qPCR_Rev | AACACAGCATTTGGACCTGC      |
| ScERG24_qPCR_Fw  | CAAGCGCGTTACTTGAGTGT      |
| ScERG24_qPCR_Rev | GCCGAGTGGAAGATGTGGAA      |
| ScERG2_qPCR_Fw   | TTGCCTCTCATTACGGGGAC      |
| ScERG2_qPCR_Rev  | GATCATTTGGCCCATCGCAC      |
| ScERG5_qPCR_Fw   | AACTTTGCGTTACAGACCTCCT    |
| ScERG5_qPCR_Rev  | GCCCTTTGGTGCGGTATAGTT     |
| ScERG7_qPCR_Fw   | CATTACACACCGTGGGGGAG      |
| ScERG7_qPCR_Rev  | CCAACCGCCATCCTTCATCT      |
| ScERG25_qPCR_Fw  | CATTACTGGGCTCACCGTCT      |
| ScERG25_qPCR_Rev | AAGACCGAATGGAGCAGCG       |
| ScERG6_qPCR_Fw   | AGCATTGAAGAACTGTGGTTTTCG  |
| ScERG6_qPCR_Rev  | AACGTA CT TCCACTCACCAGTTA |
| ScERG3_qPCR_Fw   | GTCTACCGTGCTCTGCACAA      |
| ScERG3_qPCR_Rev  | GCAAAAACCCGTCTACAGGA      |
| ScERG4_qPCR_Fw   | GCGAACGCATGTGCTAAAGG      |
| ScERG4_qPCR_Rev  | GTGTATGGGACACCGGCAAT      |
| ScERG8_qPCR_Fw   | ATCGAACCTCCCGTACAAACT     |
| ScERG8_qPCR_Rev  | GCGTCATAACCACCAGCAC       |
| ScERG9_qPCR_Fw   | CGGTATCCACGAGCAATCCA      |
| ScERG9_qPCR_Rev  | TGTAGCACTTCACGGTTGTTG     |

|                       |                                  |
|-----------------------|----------------------------------|
| ScERG12_qPCR_Fw       | TAAAGGCACCGATGACGAGG             |
| ScERG12_qPCR_Rev      | CCGATTGAGACAAGCAGTCCA            |
| ScPDR5_qPCR_Fw        | TGGGTCTGCTTGTCATTTCA             |
| ScPDR5_qPCR_Rev       | TGGCACTTGGGGTAGTCATAA            |
| ScALG9_qPCR_Ref_Fw    | CACGGATAGTGGCTTTGGTGAACAATTAC    |
| ScALG9_qPCR_Ref_Rev   | TATGATTATCTGGCAGCAGGAAAGAACTTGGG |
| ScSCR1_qPCR_Ref_Fw    | TGGGATGGGATACGTTGAGAA            |
| ScSCR1_qPCR_Ref_Rev   | CTAGCCGCGAGGAAGGATT              |
| Sc18S_qPCR_Ref_Fw     | CACTTCTTAGAGGGACTATCGGTTTC       |
| Sc18S_qPCR_Ref_Rev    | CAGAACGTCTAAGGGCATCACA           |
| CgMGE1_qPCR_Fw        | GACGTTGAGAAGGCCAAGAG             |
| CgMGE1_qPCR_Rev       | CGCATGTCCAAAGTTATCCA             |
| CgRPL10_qPCR_Ref_Fw   | GAGATTCTTTCCACTTGAGAGTCAGA       |
| CgRPL10_qPCR_Ref_Rev  | CTCTCATACCTTGTTGCAATCTATCC       |
| CgRPL13A_qPCR_Ref_Fw  | ACCAAGCTGGTAAGAAGGAATCC          |
| CgRPL13A_qPCR_Ref_Rev | GGAGCTCTAACGACTGGTCTCAA          |
| CgRPL2A_qPCR_Ref_Fw   | GCCGGTAAGAAGGCCTCTTT             |
| CgRPL2A_qPCR_Ref_Rev  | CTGTACCTGGCTTTTCTTCAA            |
| CgUBC13_qPCR_Ref_Fw   | TGCCCAGGACTACCCTATG              |
| CgUBC13_qPCR_Ref_Rev  | AGCACGTCCAGGCAGATACG             |
| CaMGE1_qPCR_Fw        | CCGCCATTTACAAGAACTACC            |
| CaMGE1_qPCR_Rev       | CGTGACCAAGTGCCAAGTT              |
| CaTEF1_qPCR_Ref_Fw    | CCACTGAAGTCAAGTCCGTTGA           |
| CaTEF1_qPCR_Ref_Rev   | CACCTTCAGCCAATTGTTCGT            |
| Ca18S_qPCR_Ref_Fw     | GATGCCCTTAGACGTTCTGG             |
| Ca18S_qPCR_Ref_Rev    | CACGACGGAGTTTCACAAGA             |

---

Table S2. Primers used in this study.
