# Supplementary material for: Mitochondrial Cochaperone Mge1 Is Involved in Regulating Susceptibility to Fluconazole in Saccharomyces cerevisiae and Candida Species
Source: PubMed Central journal article supplement (PMC5516249; doi:10.1128/mbio.00201-17), 2017-07-18
Supplement: mbo004173389st3.pdf [file mbo004173389st3.pdf]

| <b>Plasmid</b>     | <b>Backbone</b>    | <b>Insert</b>                                            | <b>Marker</b> | <b>Reference</b> |
|--------------------|--------------------|----------------------------------------------------------|---------------|------------------|
| pAFc86             | YEPlac195          | p <i>MGE1-ScMGE1-tMGE1</i>                               | <i>ScURA3</i> | This study       |
| pESc01             | YEPlac195          | p <i>MGE1-ScMGE1-GFP-tMGE1</i>                           | <i>ScURA3</i> | This study       |
| pESg01             | pCgACH             | p <i>PGK1-CgMGE1-tMGE1</i>                               | <i>CgHIS3</i> | This study       |
| pESg02             | pCgACH             | p <i>TDH3-CgMGE1-tMGE1</i>                               | <i>CgHIS3</i> | This study       |
| FBp459             | pHS12              | p <i>ADH1-preCox4-mCherry</i>                            | <i>ScLEU2</i> | (1)              |
| CIp10- <i>NAT1</i> | CIp10              | p <i>ACT1-CaNAT1-tACT1</i><br>p <i>ACT1-tACT1</i> in MCS | <i>CaURA3</i> | This study       |
| pLDa01             | CIp10- <i>NAT1</i> | p <i>ACT1-CaMGE1-tACT1</i>                               | <i>CaNAT1</i> | This study       |

Table S3. Plasmids used in this study.

1. **Swinnen E, Wilms T, Idkowiak-Baldys J, Smets B, De Snijder P, Accardo S, Ghillebert R, Thevissen K, Cammue B, De Vos D, Bielawski J, Hannun YA, Winderickx J.** 2014. The protein kinase Sch9 is a key regulator of sphingolipid metabolism in *Saccharomyces cerevisiae*. *Mol Biol Cell* **25**:196-211.
